# Supplementary material for: Application of Indigenous Rhizospheric Microorganisms and Local Compost as Enhancers of Lettuce Growth, Development, and Salt Stress Tolerance
Source: MDPI journal article supplement (doi:10.3390/microorganisms10081625), 2022-08-11
Supplement: s1 [file s1]

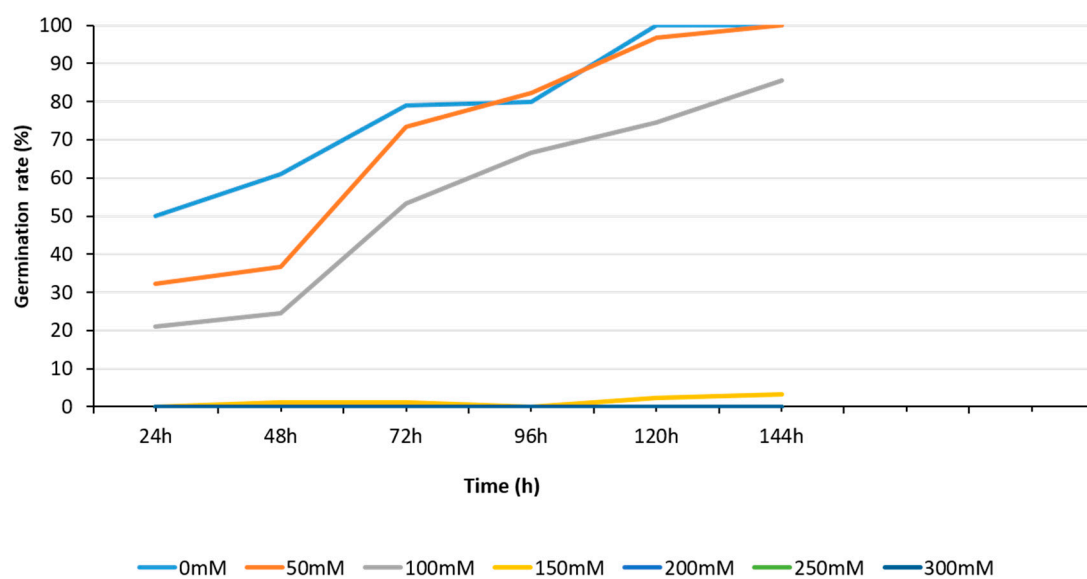

**Figure S1.** Germination rate of lettuce seeds according to different NaCl concentrations

**Table S1.** Results of multivariate analysis of variance (MANOVA) test for independent variables including salt stress (SS), arbuscular mycorrhizal fungi (AMF), plant growth promoting rhizobacteria (PGPR) and compost and their interactions.

| Treatments                    | SS  | PGPR | AMF | Compost | SS*<br>PGPR | SS*<br>AMF | SS*<br>Compost | PGPR*<br>AMF | PGPR*<br>Compost | AMF*<br>Compost | PGPR*AMF*<br>Compost | SS*PGPR*AMF | SS*AMF*<br>Compost | SS*PGPR*<br>Compost | SS* PGPR*AMF*<br>Compost |
|-------------------------------|-----|------|-----|---------|-------------|------------|----------------|--------------|------------------|-----------------|----------------------|-------------|--------------------|---------------------|--------------------------|
| MF%                           | NS  | *    | *** | NS      | NS          | NS         | NS             | *            | NS               | NS              | NS                   | NS          | NS                 | NS                  | NS                       |
| MI%                           | **  | NS   | *** | NS      | *           | **         | ***            | NS           | NS               | NS              | NS                   | *           | ***                | NS                  | NS                       |
| LN                            | *** | ***  | *** | NS      | NS          | *          | NS             | *            | NS               | **              | *                    | NS          | NS                 | NS                  | NS                       |
| SH                            | *** | **   | *** | ***     | *           | NS         | NS             | *            | NS               | ***             | ***                  | NS          | *                  | *                   | NS                       |
| RL                            | *** | ***  | *** | *       | *           | NS         | **             | NS           | **               | ***             | NS                   | NS          | NS                 | NS                  | NS                       |
| TDW                           | *** | ***  | *** | ***     | NS          | NS         | NS             | ***          | **               | ***             | **                   | *           | NS                 | NS                  | NS                       |
| P                             | *** | ***  | *** | ***     | NS          | ***        | **             | **           | *                | ***             | ***                  | NS          | NS                 | NS                  | NS                       |
| gs                            | *** | **   | *** | ***     | NS          | NS         | ***            | **           | NS               | ***             | NS                   | NS          | **                 | NS                  | NS                       |
| Fv/Fm                         | *   | *    | **  | **      | NS          | *          | NS             | *            | NS               | NS              | NS                   | *           | NS                 | NS                  | NS                       |
| T Chl                         | *** | **   | *** | NS      | NS          | *          | NS             | ***          | NS               | ***             | **                   | NS          | NS                 | NS                  | NS                       |
| Carot                         | *   | NS   | **  | ***     | *           | NS         | NS             | ***          | *                | ***             | ***                  | NS          | NS                 | NS                  | NS                       |
| WC                            | *** | ***  | *** | ***     | NS          | NS         | NS             | **           | *                | ***             | ***                  | *           | NS                 | NS                  | NS                       |
| TSS                           | *** | NS   | NS  | NS      | NS          | NS         | NS             | NS           | **               | *               | NS                   | NS          | NS                 | NS                  | NS                       |
| Prol                          | *** | ***  | NS  | ***     | **          | NS         | ***            | *            | **               | NS              | NS                   | NS          | NS                 | *                   | NS                       |
| Prot                          | *** | **   | NS  | ***     | NS          | NS         | NS             | **           | NS               | NS              | *                    | NS          | *                  | NS                  | **                       |
| POX                           | **  | NS   | NS  | ***     | NS          | NS         | NS             | NS           | NS               | NS              | **                   | NS          | NS                 | NS                  | NS                       |
| PPO                           | **  | NS   | NS  | NS      | NS          | NS         | NS             | NS           | **               | *               | *                    | NS          | NS                 | NS                  | NS                       |
| H <sub>2</sub> O <sub>2</sub> | *** | ***  | **  | **      | *           | NS         | **             | NS           | ***              | *               | NS                   | *           | **                 | *                   | NS                       |
| MDA                           | *** | NS   | NS  | **      | **          | NS         | NS             | *            | *                | **              | *                    | NS          | NS                 | NS                  | NS                       |
| pH                            | NS  | NS   | NS  | ***     | NS          | NS         | NS             | NS           | NS               | NS              | **                   | NS          | NS                 | NS                  | NS                       |
| EC                            | **  | NS   | *   | ***     | **          | NS         | NS             | ***          | ***              | ***             | ***                  | NS          | NS                 | NS                  | NS                       |
| TOM                           | NS  | NS   | *   | ***     | NS          | NS         | ***            | ***          | ***              | ***             | NS                   | NS          | **                 | NS                  | NS                       |
| TOC                           | NS  | NS   | *   | ***     | NS          | NS         | ***            | ***          | ***              | ***             | NS                   | NS          | **                 | NS                  | NS                       |
| AP                            | *   | NS   | NS  | ***     | NS          | NS         | **             | NS           | NS               | NS              | NS                   | NS          | NS                 | NS                  | NS                       |
| Glo                           | *** | *    | **  | *       | NS          | NS         | NS             | NS           | **               | ***             | *                    | NS          | *                  | *                   | NS                       |

MF: Myorrhization frequency; MI: Mycorrhization intensity; LN: leaf number; SH: shoot height; RL: roots length; TDW: total dry weight; P: phosphorus in plant; gs: stomatal conductance; Fv/Fm: chlorophyll fluorescence; T Chl: total chlorophyll; Carot: carotenoids; WC: water content; TSS: Total soluble sugars; Prol: proline; Prot: protein; POX: peroxidase activity; PPO: polyphenol oxidase activity; H<sub>2</sub>O<sub>2</sub>: hydrogen peroxide; MDA: malondialdehyde; pH: hydrogen potential; EC: electrical conductivity; TOM: total organic matter; TOC: total organic carbon; AP: available phosphorus; Glo: Glomalin; SS: salt stress; NS: not significant, \*: P < 0.05, \*\*: P < 0.01 and \*\*\*: P < 0.001.
